# Supplementary material for: Systemic pharmacological suppression of neural activity reverses learning impairment in a mouse model of Fragile X syndrome
Source: eLife. 2024 Jul 2;12:RP92543. doi: 10.7554/eLife.92543 (PMC11219043; doi:10.7554/eLife.92543)
Supplement: Figure 1—source data 1. [file elife-92543-fig1-data1.xlsx]

## Sheet: Figure-01
			Figure-1 (A) : VOR-increase learning						Figure-1 (B) : VOR-decrease learning
			Wild Type ( N=12)		L7-Fmr1 KO (N=14)				Wild Type (N=10)		L7-Fmr1 KO (N=11)
		Time (Minute)	% VOR	SEM	% VOR	SEM			% VOR	SEM	% VOR	SEM
		0 min	0	0	0	0			0	0	0	0
		10 min	20.3804	4.85321	-9.34187	6.81675			-25.1915	6.80281	-23.8023	3.31441
		20 min	28.8747	8.73233	2.72485	7.83313			-26.1094	7.18385	-30.6651	4.47232
		30 min	28.9828	5.15827	-2.43863	6.11028			-26.8293	5.70933	-37.8738	3.90894
