# Supplementary material for: Systemic pharmacological suppression of neural activity reverses learning impairment in a mouse model of Fragile X syndrome
Source: eLife. 2024 Jul 2;12:RP92543. doi: 10.7554/eLife.92543 (PMC11219043; doi:10.7554/eLife.92543)
Supplement: Figure 2—source data 1. [file elife-92543-fig2-data1.xlsx]

## Sheet: Figure-02
			Figure-2 (A) : VOR-increase learning without pre-training							Figure-2 (B) : VOR-increase learning after VOR-decrease pre-training								Figure-2 (C) : VOR-increase learning after Vestibular only pre-training
			Wild Type ( N=10)		L7-Fmr1 KO (N=11)					Wild Type ( N=10)		L7-Fmr1 KO (N=11)						Wild Type ( N=10)		L7-Fmr1 KO (N=11)
		Time (Minute)	% VOR	SEM	% VOR	SEM			Time (Minute)	% VOR	SEM	% VOR	SEM				Time (Minute)	% VOR	SEM	% VOR	SEM
		0	0	0	0	0		Pre-	-30	0	0	0	0			Pre-	-30	0	0	0	0
		10	22.5158	5.57324	-8.20984	6.88888		Pre-	-20	-25.1915	6.80281	-23.8023	3.31441			Pre-	-20	-0.09977	7.23021	-3.91576	4.41802
		20	28.8903	10.5393	6.66317	8.28284		Pre-	-10	-26.1094	7.18384	-30.6651	4.47233			Pre-	-10	-11.9054	6.4294	-15.221	6.37857
		30	29.2729	6.23119	1.71856	6.93375		Pre-	0	-26.8294	5.70934	-37.8738	3.90893			Pre-	0	-10.0231	5.90194	-19.4716	5.33632
								Post	10	-24.6696	6.0099	-29.5406	5.87029			Post	10	-2.33817	8.44041	-14.0659	5.65199
								Post	20	-8.11043	8.29415	-20.2882	6.40529			Post	20	2.32027	8.84385	-4.70172	6.36376
								Post	30	-7.00658	9.45701	-19.0476	5.68288			Post	30	4.06946	8.83742	1.53531	7.82236
