# Supplementary material for: Systemic pharmacological suppression of neural activity reverses learning impairment in a mouse model of Fragile X syndrome
Source: eLife. 2024 Jul 2;12:RP92543. doi: 10.7554/eLife.92543 (PMC11219043; doi:10.7554/eLife.92543)
Supplement: Figure 3—source data 1. [file elife-92543-fig3-data1.xlsx]

## Sheet: Figure-03
			1 day post-Diazepam													1 week post-Diazepam
			Figure-3 (B) : VOR-increase learning						Figure-3 (B) : VOR-decrease learning							Figure-3 (C) : VOR-increase learning
			Wild Type ( N=7)		L7-Fmr1 KO (N=9)				Wild Type (N=7)		L7-Fmr1 KO (N=8)					Wild Type (N=6)		L7-Fmr1 KO (N=9)
		Time (Minute)	% VOR	SEM	% VOR	SEM			% VOR	SEM	% VOR	SEM				% VOR	SEM	% VOR	SEM
		0 min	0	0	0	0			0	0	0	0				0	0	0	0
		10 min	25.2144	11.9235	8.79842	4.60803			-9.32517	5.0143	-14.8145	4.25151				12.6282	11.214	10.5154	11.7215
		20 min	22.6956	13.431	31.3719	11.2669			-29.0598	4.89202	-37.5925	4.67581				24.7414	8.11894	-1.49782	6.74301
		30 min	20.9516	11.5465	20.7115	9.67576			-26.1717	5.29304	-33.6816	3.68837				21.435	9.15044	1.05374	4.94806
