# Supplementary material for: Systemic pharmacological suppression of neural activity reverses learning impairment in a mouse model of Fragile X syndrome
Source: eLife. 2024 Jul 2;12:RP92543. doi: 10.7554/eLife.92543 (PMC11219043; doi:10.7554/eLife.92543)
Supplement: Figure 4—source data 1. [file elife-92543-fig4-data1.xlsx]

## Sheet: Figure-04
			Figure-4 (A) : No-Pre-Training						Figure-4 (A) : VOR-decrease Pre-Training					Figure-4 (A) : Vestibular only Pre-Training
			Wild Type ( N=7)		L7-Fmr1 KO (N=9)				Wild Type (N=7)		L7-Fmr1 KO (N=8)			Wild Type (N=6)		L7-Fmr1 KO (N=9)
			% VOR	SEM	% VOR	SEM			% VOR	SEM	% VOR	SEM		% VOR	SEM	% VOR	SEM
		VOR-increase learning	33.5742	7.75946	7.1868	6.34574			53.7281	23.1255	14.0954	13.9173		50.4964	8.79832	17.8694	9.22428
			Figure-4 (B) : Saline						Figure-4 (B) : Diazepam
			Wild Type ( N=7)		L7-Fmr1 KO (N=9)				Wild Type (N=7)		L7-Fmr1 KO (N=8)
			% VOR	SEM	% VOR	SEM			% VOR	SEM	% VOR	SEM
		VOR-increase learning	18.6227	12.0116	10.593	6.80729			19.3787	9.93287	11.3021	5.93126
