# Supplementary material for: Systemic pharmacological suppression of neural activity reverses learning impairment in a mouse model of Fragile X syndrome
Source: eLife. 2024 Jul 2;12:RP92543. doi: 10.7554/eLife.92543 (PMC11219043; doi:10.7554/eLife.92543)
Supplement: Figure 5—source data 1. [file elife-92543-fig5-data1.xlsx]

## Sheet: Figure-05
		Figure-5 (B) : OKR learning 1 day post-Saline						Figure-5 (C) : OKR learning 1 day post-Diazepam
		Wild Type ( N=7)		L7-Fmr1 KO (N=10)				Wild Type ( N=10)		L7-Fmr1 KO (N=10)
	Time (Minute)	% OKR	SEM	% OKR	SEM		Time (Minute)	% OKR	SEM	% OKR	SEM
	0	0	0	0	0		0	0	0	0	0
	10	35.541	0.8035	-7.536	1.0043		10	10.57	0.8429	6.345	0.6067
	20	41.353	0.9472	9.551	0.6338		20	30.587	0.9451	26.396	0.8324
	30	51.284	0.8751	6.265	0.7878		30	25.217	0.977	39.07	0.9844
	40	48.327	0.8988	15.103	0.8454		40	42.574	1.9666	41.076	0.7258
	50	52.109	0.7633	23.947	1.2386		50	41.46	1.5902	60.458	0.9321
	60	53.448	1.0198	13.479	0.7848		60	31.273	1.0496	71.676	1.1048
